# Supplementary material
Source: publisher site journal article supplement (https://www.spandidos-publications.com/8662/downloadSupplementary)
Supplement: Supplementary file 1 [file downloadSupplementary]

Table SI. SCORTEN scoring system to assess severity and predict mortality in Stevens-Johnson syndrome/TEN.

| Scoring item                     | SCORTEN scoring criterion (1 point for meeting the criterion) |
|----------------------------------|---------------------------------------------------------------|
| Age                              | $\geq 40$ years                                               |
| Complicated with malignant tumor | History of malignant tumor or current malignant tumor         |
| Heart rate                       | $\geq 120$ beats per minute                                   |
| Epidermal detachment area        | Involving body surface area $\geq 10\%$                       |
| Blood urea nitrogen              | $\geq 10$ mmol/l (~28 mg/dl)                                  |
| Blood glucose                    | $\geq 14$ mmol/l (~252 mg/dl)                                 |
| Bicarbonate                      | $\leq 20$ mmol/l                                              |

SCORTEN, Severity of Illness Score for TEN. TEN, toxic epidermal necrolysis.

Table SII. Interpretation of the SCORTEN score.

| SCORTEN score | Predicted mortality rate, % |
|---------------|-----------------------------|
| 0-1           | 3.2                         |
| 2             | 12.1                        |
| 3             | 35.3                        |
| 4             | 54.3                        |
| $\geq 5$      | 90.0                        |

SCORTEN, Severity of Illness Score for TEN.
